# Supplementary material for: The small molecule PSSM0332 disassociates the CRL4ADCAF8 E3 ligase complex to decrease the ubiquitination of NcoR1 and inhibit the inflammatory response in a mouse sepsis-induced myocardial dysfunction model
Source: Int J Biol Sci. 2020 Sep 19;16(15):2974–88. doi: 10.7150/ijbs.50186 (PMC7545708; doi:10.7150/ijbs.50186)
Supplement: Supplementary file 1 — Supplementary figures and tables. [file ijbsv16p2974s1.pdf]

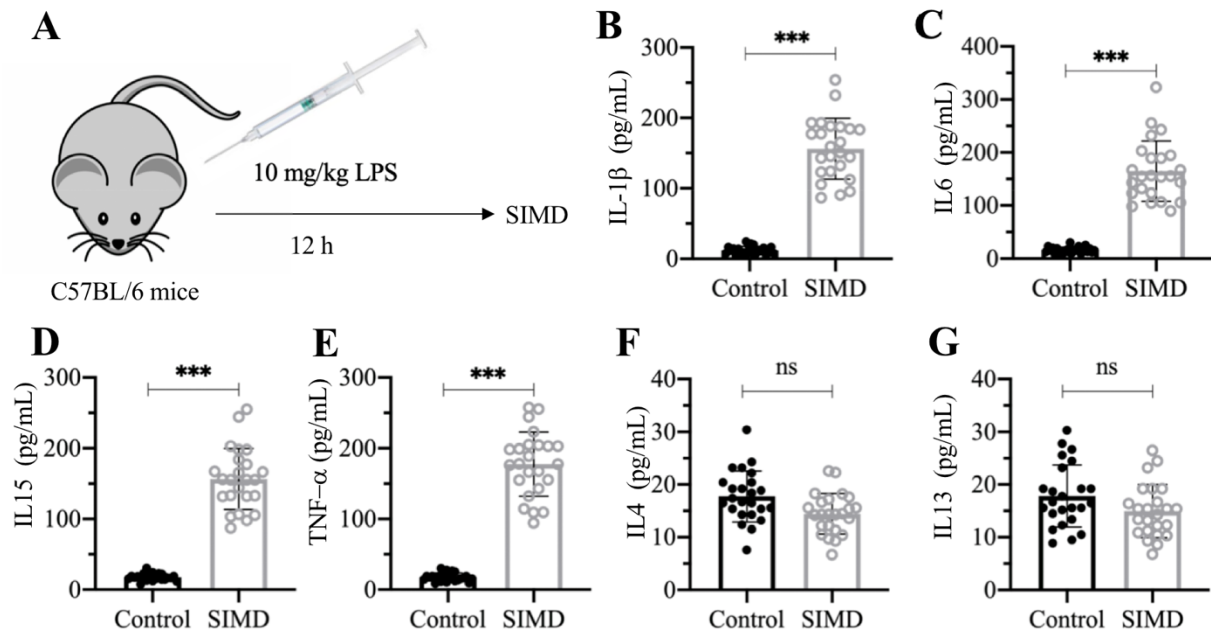

### Supplementary Figure 1. The establishment of SIMD-mice and their serum concentrations of proinflammatory cytokines

(A) A representative model of LPS-induced SIMD-mouse. Similar weight (~22 g) of six-week-old C57BL/6 mice (n=48, male) were randomly divided into two groups, and were intraperitoneally injected with PBS (Control, n=24) and LPS (10 mg/kg) to generate SIMD-mice. After 12 h of injection, the blood samples were collected and the serum concentrations of four proinflammatory cytokines including IL-1 $\beta$  (B), IL6 (C), IL15 (D), and TNF- $\alpha$  (E), as well as two anti-inflammatory cytokines including IL4 (F) and IL13 (G) were examined using ELISA assays. \*\*\* $P < 0.001$ , ns represented no significant difference.

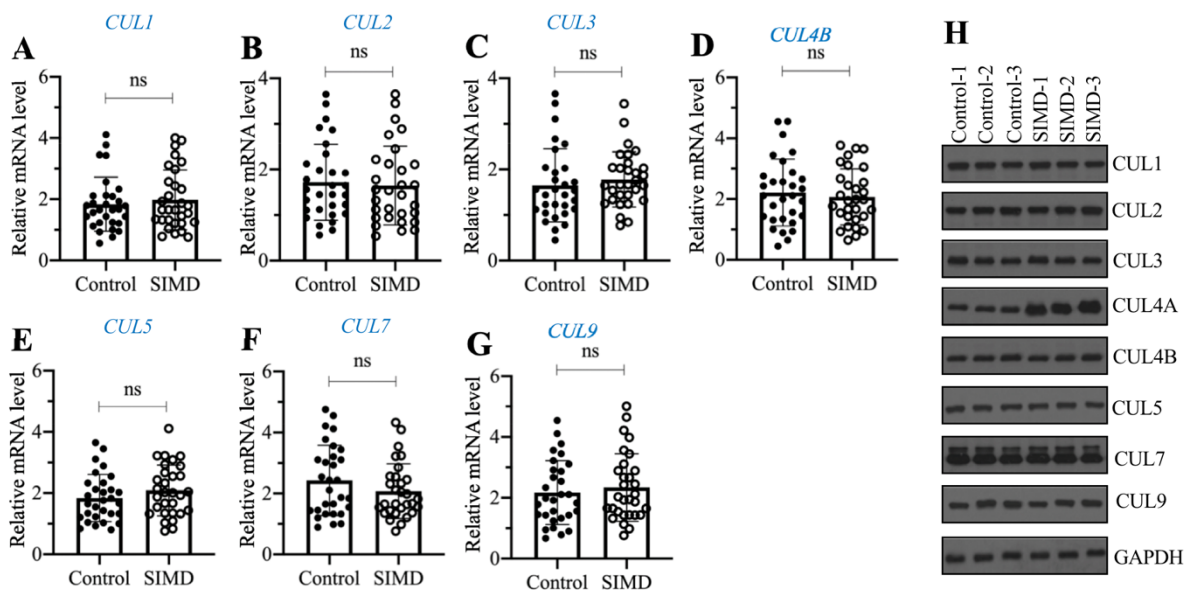

**Supplementary Figure 2. The other seven cullin genes was not overexpressed in SIMD-heart tissues.**

The same total RNA samples used in Figure 1B were applied to RT-qPCR analyses to examine mRNA levels of *CUL1* (A), *CUL2* (B), *CUL3* (C), *CUL4B* (D), *CUL5* (E), *CUL7* (F), and *CUL9* (G). ns represented no significant difference. (H) The protein levels of Cullins. Total cell extracts from three independent heart tissues of control-mice and SIMD-mice were used for western blotting to examine the protein levels of CUL1, CUL2, CUL3, CUL4A, CUL4B, CUL5, CUL7 and CUL9, respectively. GAPDH was set as a loading control.

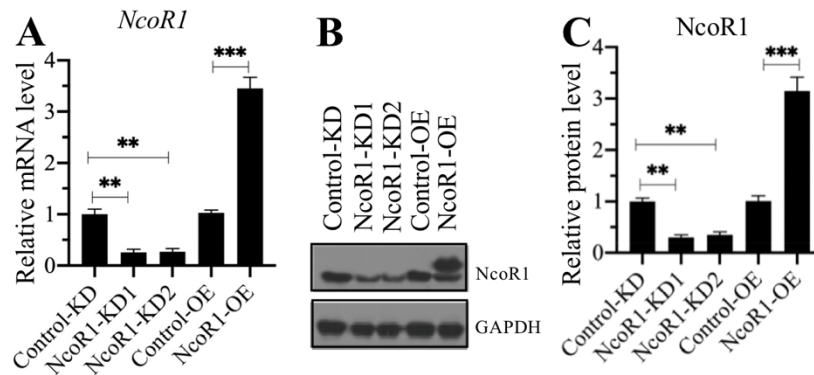

**Supplementary Figure 3. The mRNA and protein levels of NcoR1 in its knockdown and overexpression cell lines.**

**(A)** The mRNA level of *NcoR1*. Total RNA from Control-KD, NcoR1-KD1, NcoR1-KD2, Control-OE, and NcoR1-OE cells were subjected to RT-qPCR analysis to examine mRNA level of *NcoR1*. \*\*  $P < 0.01$  and \*\*\*  $P < 0.001$ . **(B)** The protein level of NcoR1. Total cell extracts from cells used in (A) were subjected to immunoblots to examine NcoR1 protein level. **(C)** The relative protein level of NcoR1. The protein signals in (B) were quantified using Image J software and then normalized to their corresponding GAPDH. \*\*  $P < 0.01$  and \*\*\*  $P < 0.001$ .

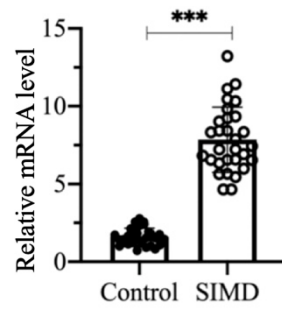

**Supplementary Figure 4. The relative mRNA level of *HMGB1* in SIMD heart tissues**

Total RNA samples isolated from heart tissues of controls (n=24) and SIMD mice (n=24) were used to detect the mRNA level of *HMGB1*. \*\*\*  $P < 0.001$ .

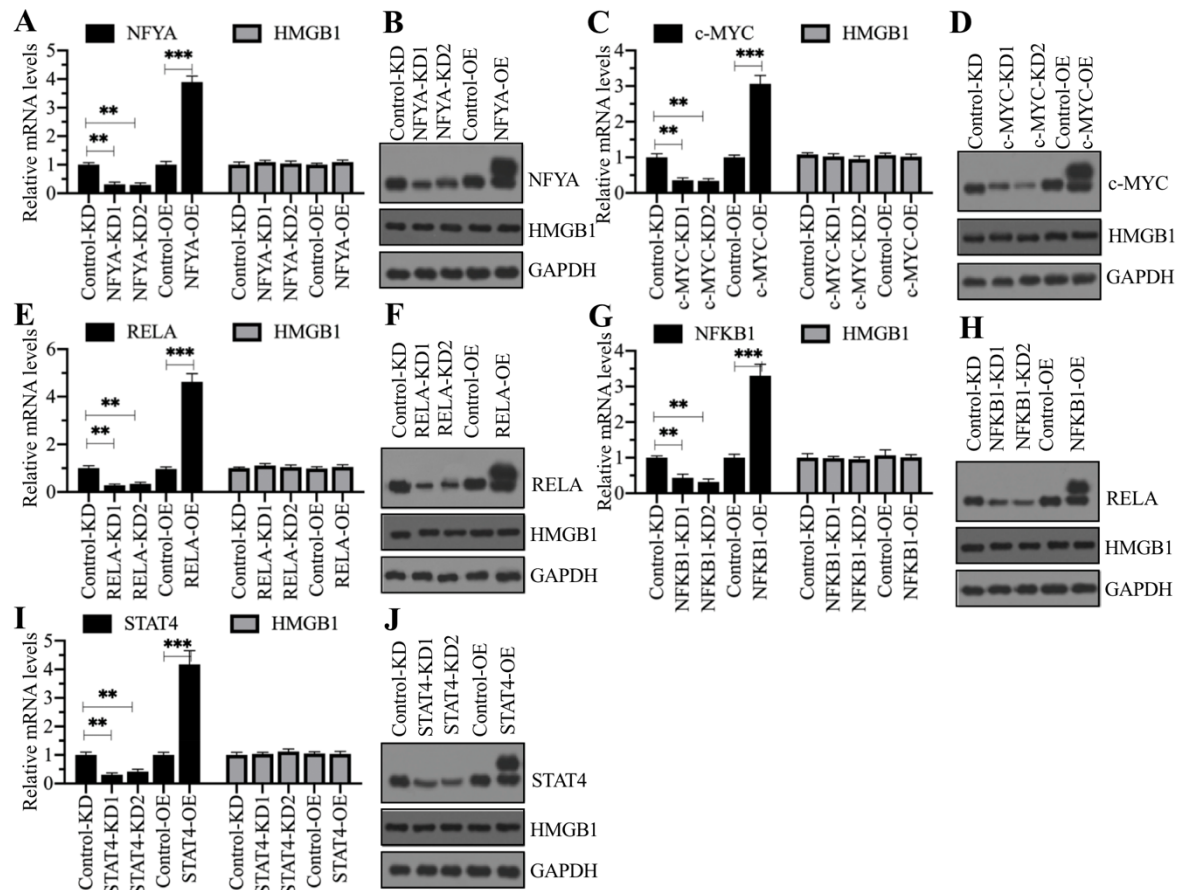

**Supplementary Figure 5. The mRNA and protein levels of TFs in their corresponding knockdown and overexpression cell lines.**

(A and B) The mRNA and protein levels of NFYA and HMGB1. Total RNA and total protein extracts from Control-KD, NFYA-KD1, NFYA-KD2, Control-OE, and NFYA-OE cells were subjected to RT-qPCR and immunoblots to examine the mRNA (A) and protein (B) levels of NFYA and HMGB1. \*\*  $P < 0.01$  and \*\*\*  $P < 0.001$ . (C and D) The mRNA and protein levels of c-MYC and HMGB1. Total RNA and total protein extracts from Control-KD, c-MYC-KD1, c-MYC-KD2, Control-OE, and c-MYC-OE cells were subjected to RT-qPCR and immunoblots to examine the mRNA (C) and protein (D) levels of c-MYC and HMGB1. \*\*  $P < 0.01$  and \*\*\*  $P < 0.001$ . (E and F) The mRNA and protein levels of RELA and HMGB1. Total RNA and total protein extracts from Control-KD, RELA-KD1, RELA-KD2, Control-OE, and RELA-OE cells were subjected to RT-qPCR and immunoblots to examine the mRNA (E) and protein (F) levels of RELA and HMGB1. \*\*  $P < 0.01$  and \*\*\*  $P < 0.001$ . (G and H) The mRNA and protein levels of NFKB1 and HMGB1. Total RNA and total protein extracts from Control-KD, NFKB1-KD1,

NFKB1-KD2, Control-OE, and NFKB1-OE cells were subjected to RT-qPCR and immunoblots to examine the mRNA (**G**) and protein (**H**) levels of NFKB1 and HMGB1. \*\*  $P < 0.01$  and \*\*\*  $P < 0.001$ . (**I** and **J**) The mRNA and protein levels of STAT4 and HMGB1. Total RNA and total protein extracts from Control-KD, STAT4-KD1, STAT4-KD2, Control-OE, and STAT4-OE cells were subjected to RT-qPCR and immunoblots to examine the mRNA (**I**) and protein (**J**) levels of STAT4 and HMGB1. \*\*  $P < 0.01$  and \*\*\*  $P < 0.001$ .

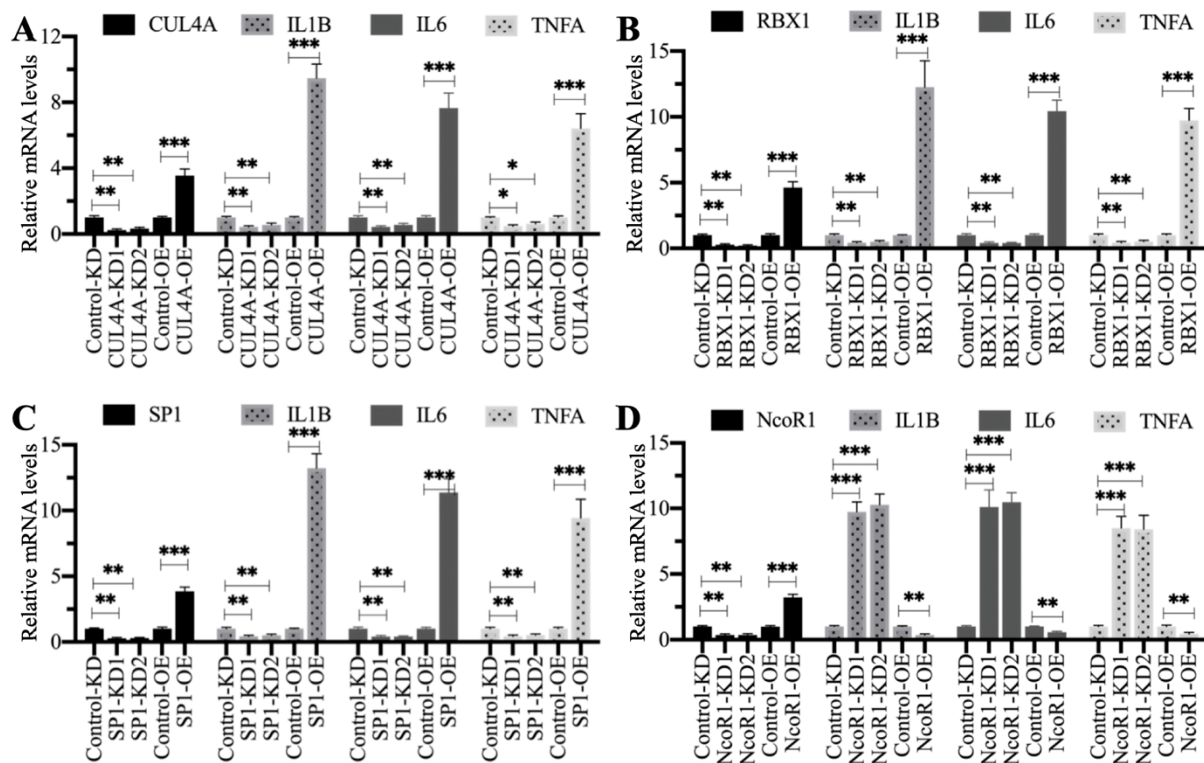

**Supplementary Figure 6. The mRNA levels of proinflammatory cytokine genes in the knockdown and overexpression cells of *CUL4A*, *RBX1*, *SPI1* and *NcoR1*.**

**(A)** The mRNA levels of proinflammatory cytokine genes in the knockdown and overexpression cells of *CUL4A*. Total RNA from Control-KD, SP1-KD1, SP11-KD2, Control-OE, and SP1-OE cells were subjected to RT-qPCR analyses to examine mRNA levels of *CUL4A*, *IL1B*, *IL6* and *TNFA*, respectively. **(B)** The mRNA levels of proinflammatory cytokine genes in the knockdown and overexpression cells of *RBX1*. Total RNA from Control-KD, RBX1-KD1, RNX1-KD2, Control-OE, and RBX1-OE cells were subjected to RT-qPCR analyses to examine mRNA levels of *RBX1*, *IL1B*, *IL6* and *TNFA*, respectively. **(C)** The mRNA levels of proinflammatory cytokine genes in the knockdown and overexpression cells of *SPI1*. Total RNA from Control-KD, SP1-KD1, SP1-KD2, Control-OE, and SP1-OE cells were subjected to RT-qPCR analyses to examine mRNA levels of *SPI1*, *IL1B*, *IL6* and *TNFA*, respectively. **(D)** The mRNA levels of proinflammatory cytokine genes in the knockdown and overexpression cells of *NcoR1*. Total RNA from Control-KD, NcoR1-KD1, NcoR1-KD2, Control-OE, and NcoR1-OE cells were subjected to RT-qPCR analyses to examine mRNA levels of *NcoR1*, *IL1B*, *IL6* and *TNFA*, respectively.

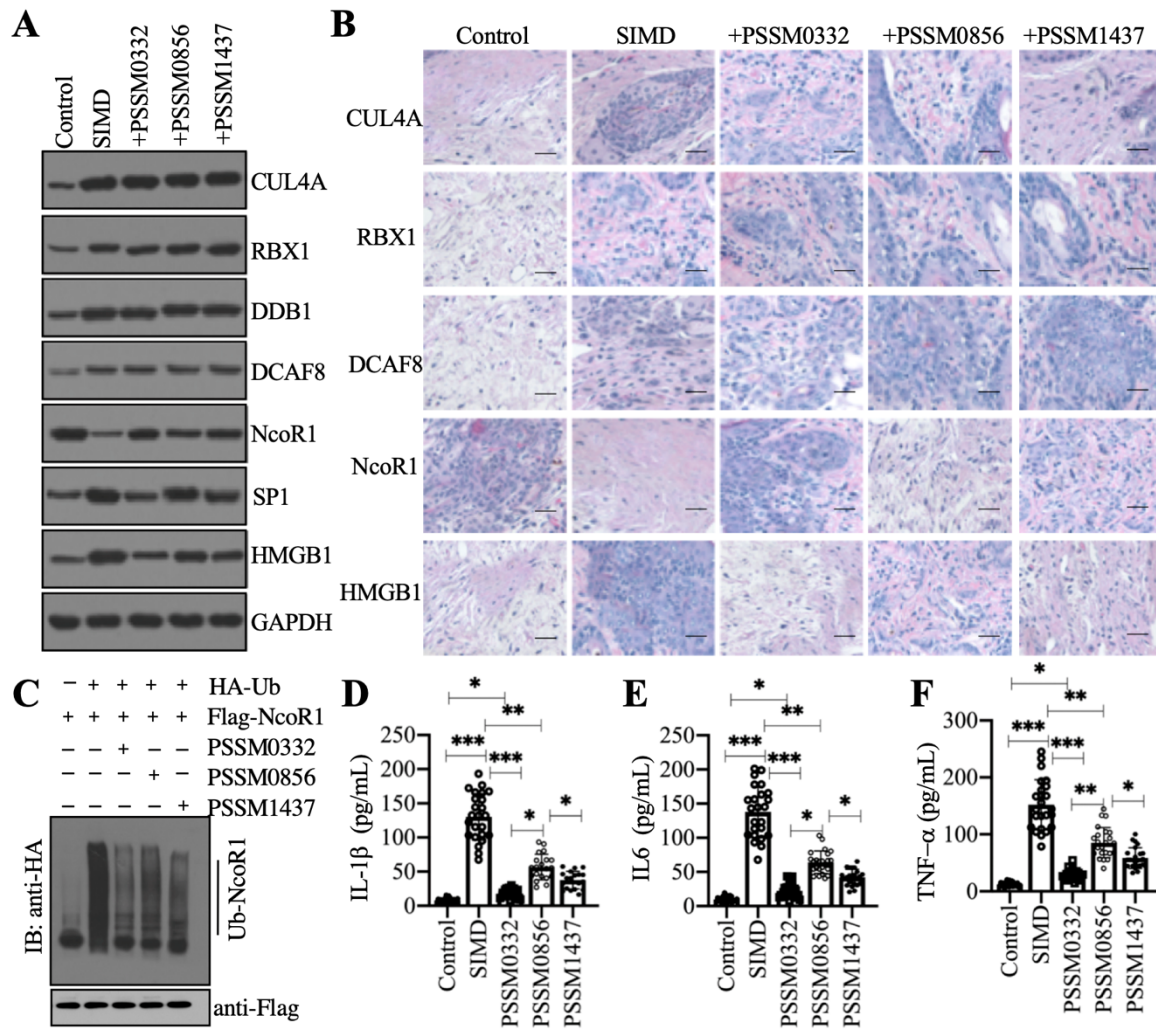

**Supplementary Figure 7. PSSM0332 significantly reversed the CUL4A<sup>DCAF8</sup> downstream events.**

**(A)** The effects of PSSM0332 on the protein levels of the CUL4A<sup>DCAF8</sup> components NcoR1, SP1 and HMGB1. Three independent heart tissues from the untreated mice (control), SIMD mice, and SIMD mice injected with PSSM0332, PSSM0856 or PSSM1437 were subjected to protein isolation and immunoblots to examine the protein levels of CUL4A, RBX1, DDB1, DCAF8, NcoR1, SP1 and HMGB1. GAPDH was used as a loading control. **(B)** Representative IHC staining images of heart tissues. Three independent heart tissues from the untreated mice (control), SIMD mice, and SIMD mice injected with PSSM0332, PSSM0856 or PSSM1437 were subjected to IHC staining with anti-CUL4A, anti-RBX1, anti-DCAF8, anti-NcoR1 and anti-HMGB1, respectively. A representative image from each group is presented. Bars= 100  $\mu$ m. **(C)** *In vivo* ubiquitination assay results. RAW246.7 cells were transfected with pcDNA3-2 $\times$ Flag-NcoR1 alone or

cotransfected with pcDNA3-2×Flag-NcoR1 and HA-ubiquitin plasmids. After 48 h, the cells cotransfected with pcDNA3-2×Flag-NcoR1 and HA-ubiquitin were further treated with 4  $\mu$ M PSSM0332, PSSM0856 or PSSM1437 for 6 h. Cells were immunoprecipitated with an anti-Flag antibody, and the ubiquitination of NcoR1 was detected using an anti-HA antibody. <sup>Flag</sup>NcoR1 was a loading control. **(D-F)** The serum concentrations of proinflammatory cytokines. Blood samples from untreated mice (Control), SIMD mice, and SIMD mice injected with PSSM0332, PSSM0856 or PSSM1437 were used for ELISAs to measure the circulating levels of IL-1 $\beta$  **(D)**, IL6 **(E)** and TNF- $\alpha$  **(F)**. \*  $P < 0.05$ , \*\*  $P < 0.01$  and \*\*\*  $P < 0.001$ .

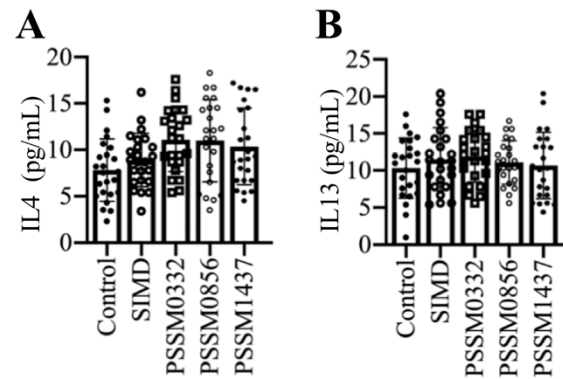

**Supplementary Figure 8. The serum concentrations of IL4 and IL13 in SIMD-mice treated with small molecules.**

The blood samples used in Supplementary Figure 7D were subjected to ELISA assays to measure the concentrations of IL4 (**A**) and IL13 (**B**).

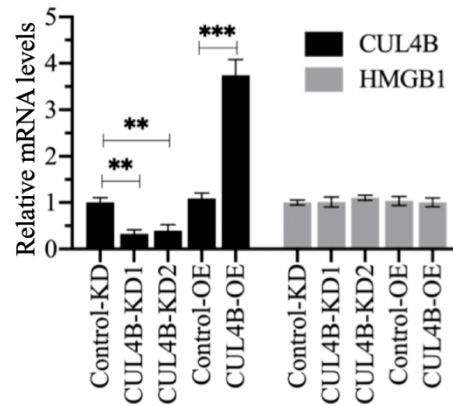

### Supplementary Figure 9. The relative mRNA levels of *CUL4B* and *HMGB1*

Total RNA samples isolated from Control-KD, CUL4B-KD (#1 and #2), Control-OE, and CUL4B-OE cells were used to detect the mRNA level of *CUL4B* and *HMGB1*. \*\*  $P < 0.01$  and \*\*\*  $P < 0.001$ .

**Supplementary Table-1. Primers used for RT-qPCR analyses**

| Gene    | Forward Primers              | Reverse primers               |
|---------|------------------------------|-------------------------------|
| CUL1    | 5'-GGAAGGTCCTGAAACACCAG-3'   | 5'-CTTCTCACCATCGACTCGCTC-3'   |
| CUL2    | 5'-TCGCTGGCACCCTTCCACAGT-3'  | 5'-ACCAGAGTATCTGAATGCC-3'     |
| CUL3    | 5'-GTGAAGACAGCTCAGCTGTA-3'   | 5'-GTAAGGTAGCAGAGCCAGCA-3'    |
| CUL4A   | 5'-AGGCTGCCACTCGGATCTCTGC-3' | 5'-GTCTCATGACAGACATGATGT-3'   |
| CUL4B   | 5'-ATCAAGCATGCTACTGGGAT-3'   | 5'-GTCACCATCTTCAATATCT-3'     |
| CUL5    | 5'-GGAGCAGATGGAGTGGCTG-3'    | 5'-AGCCTCTGCCCAGGCCTTCAG-3'   |
| CUL7    | 5'-CCTTGTTGTCCGAATCCTC-3'    | 5'-ATCAGAGCTCCTGCAGGTT-3'     |
| CUL9    | 5'-GAGTACATGGATGTGGTAG-3'    | 5'-TGAGGCAGTCGGCCCGCAGGAA-3'  |
| IL1B    | 5'-AGTTCCCCAACTGGTACAT-3'    | 5'-CTGGGGAAGGCATTAGAAACAGT-3' |
| S100A8  | 5'-TCGTGACAATGCCGTCTGAACT-3' | 5'-CTGCACAACTGAGGACACTCA-3'   |
| PLD2    | 5'-AGCTGTGGCAAGAAACAGCGGA-3' | 5'-GCAAGCTCAGACTGAGCCAAA-3'   |
| ZFP91   | 5'-AGGCTTACCGTACCTTCCAAGG-3' | 5'-TCCTCTAGCTGGTAGGCGAA-3'    |
| BIRC5   | 5'-GATGACAACCCGATAGAGGA-3'   | 5'-TGTTGTTGGTCTCCTTTGCA-3'    |
| NcoR1   | 5'-ACGGATGCTCAGCAGTACACC-3'  | 5'-TCAGTCGTCACTATCAGACA-3'    |
| HMGB1   | 5'-TCCTTACACGAGGACTCTCCT-3'  | 5'-CGCTGGGACTAAGGTCAACA-3'    |
| IL6     | 5'-GCTGGAGTCACAGAAGGAGTG-3'  | 5'-CACAGTGAGGAATGTCCAC-3'     |
| CCL2    | 5'-CTACAAGAGGATCACCAGCAG-3'  | 5'-TGTCTGGACCCATTCTTC-3'      |
| DNM2    | 5'-ATGGAGCACAAGAGAACAC-3'    | 5'-TCATGAGGTGCATGATGGTC-3'    |
| FEN1    | 5'-CAGCAAGTACCCCGTTCCAGA-3'  | 5'-TCTTCTTCATTTGGCTCGCT-3'    |
| CCN2    | 5'-CTACAAGAGGATCACCAGCA-3'   | 5'-TGATCTCATTTGGTTCCGATC-3'   |
| NFYA    | 5'-TCTAGAGAGCAAGGGCCCTG-3'   | 5'-CTTCAGGCAATATAAGGAT-3'     |
| c-MYC   | 5'-TCCAGGACTGTATGTGGAG-3'    | 5'-GGTGAGGTCCTGCAGGTACA-3'    |
| RELA    | 5'-TGCTGATGGAGTACCCTGA-3'    | 5'-AGTCCATGTCCGCAATGGA-3'     |
| NFKB1   | 5'-AATGGGAAACCGTATGAG-3'     | 5'-GTGGCCCAGTTTTTGTCTG-3'     |
| STAT4   | 5'-TCTAATGTCAGCCAACT-3'      | 5'-GACATAGGATGAAAATTGCC-3'    |
| SP1     | 5'-TCTCCACAGCACTCATGTGAG-3'  | 5'-CAGGCTCCTCTACCTCCAC-3'     |
| β-Actin | 5'-TACAGCTTCACCACCACAGC-3'   | 5'-GGCAGCTCATAGCTCTTCT-3'     |

**Supplementary Table-2. The aberrantly expressed genes in SIMD-heart tissues**

| Gene    | Gene description                                       | Average fold change | P Value  | Expression |
|---------|--------------------------------------------------------|---------------------|----------|------------|
| PLD2    | Phospholipase D2                                       | -18.2               | 0.00073  | Down       |
| ALAS1   | 5'-Aminolevulinate Synthase 1                          | -16.3               | 0.0021   | Down       |
| TGM2    | Transglutaminase 2                                     | -14.5               | 0.0056   | Down       |
| LDHA    | Lactate Dehydrogenase A                                | -13.2               |          | Down       |
| ALDH1A1 | Aldehyde Dehydrogenase 1 Family Member A1              | -11.8               | 0.00092  | Down       |
| PTEN    | Phosphatase And Tensin Homolog                         | -10.2               | 0.000051 | Down       |
| TAF5    | TATA-Box Binding Protein Associated Factor 5           | -9.8                | 0.00088  | Down       |
| WSB1    | WD Repeat And SOCS Box Containing 1                    | -9.2                | 0.00035  | Down       |
| GCAT    | Glycine C-Acetyltransferase                            | -9.8                | 0.00092  | Down       |
| CIAO1   | Cytosolic Iron-Sulfur Assembly Component 1             | -9.3                | 0.00078  | Down       |
| ZFP91   | Zinc Finger Protein 91                                 | -9.1                | 0.00088  | Down       |
| GNG11   | G Protein Subunit Gamma 11                             | -8.3                | 0.0032   | Down       |
| XIAP    | X-Linked Inhibitor Of Apoptosis                        | -7.6                | 0.0082   | Down       |
| BARD1   | BRCA1 Associated RING Domain 1                         | -7.1                | 0.0012   | Down       |
| NR1H3   | Nuclear Receptor Subfamily 1 Group H Member 3          | -6.6                | 0.00045  | Down       |
| PGS1    | Phosphatidylglycerophosphate Synthase 1                | -5.3                | 0.00035  | Down       |
| CDH1    | Cadherin 1                                             | -4.6                | 0.00094  | Down       |
| BIRC5   | Baculoviral IAP Repeat Containing 5                    | -4.2                | 0.00074  | Down       |
| PIAS3   | Protein Inhibitor Of Activated STAT3                   | -3.3                | 0.00083  | Down       |
| IL1B    | Interleukin 1 beta                                     | 19.4                | 0.00071  | Up         |
| HMGB1   | High Mobility Group Box 1                              | 17.5                | 0.00054  | Up         |
| IL6     | Interleukin 6                                          | 16.4                | 0.000092 | Up         |
| TNFA    | Tumor Necrosis Factor-Alpha                            | 15.4                | 0.0022   | Up         |
| CUL4A   | Cullin 4A                                              | 14.6                | 0.0018   | Up         |
| IL15    | Interleukin 15                                         | 13.8                | 0.0032   | Up         |
| IL18    | Interleukin 18                                         | 12.6                | 0.0036   | Up         |
| IFNG    | Interferon Gamma                                       | 11.5                | 0.0044   | Up         |
| CSF1    | Colony Stimulating Factor 1                            | 10.9                | 0.0019   | Up         |
| IL12    | Interleukin 12                                         | 10.2                | 0.00048  | Up         |
| BAX     | BCL2 Associated X                                      | 9.6                 | 0.00038  | Up         |
| Bim     | Bcl-2 Interacting Mediator                             | 9.2                 | 0.00044  | Up         |
| MMP2    | Matrix Metalloproteinase 2                             | 8.7                 | 0.00085  | Up         |
| NOD2    | Nucleotide Binding Oligomerization Domain Containing 2 | 8.2                 | 0.00029  | Up         |
| SP1     | Specificity Protein 1                                  | 7.6                 | 0.0012   | Up         |
| NOS1    | Nitric Oxide Synthase 1                                | 7.2                 | 0.0044   | Up         |
| ICAM1   | Intercellular Adhesion Molecule 1                      | 6.8                 | 0.0065   | Up         |
| TLR4    | Toll Like Receptor 4                                   | 6.2                 | 0.0019   | Up         |
| TGFB1   | Transforming Growth Factor Beta 1                      | 5.6                 | 0.0043   | Up         |
| ITGA8   | Integrin Subunit Alpha 8                               | 5.2                 | 0.0012   | Up         |
| HIF1A   | Hypoxia Inducible Factor 1 Subunit Alpha               | 4.7                 | 0.0055   | Up         |
| IL33    | Interleukin 33                                         | 4.3                 | 0.0012   | Up         |
| IL23    | Interleukin 23                                         | 3.8                 | 0.00093  | Up         |

|        |                                 |     |         |    |
|--------|---------------------------------|-----|---------|----|
| PRF1   | Perforin 1                      | 3.2 | 0.00012 | Up |
| S100A8 | S100 Calcium Binding Protein A8 | 3.1 | 0.00032 | Up |
| S100A9 | S100 Calcium Binding Protein A9 | 2.6 | 0.00077 | Up |

**Supplementary Table-3. The DDB1-associated proteins identified by LC-MS/MS**

| <b>Protein</b> | <b>Protein description</b>                                   | <b>Molecular weight (kDa)</b> | <b>MASCOT scores</b> |
|----------------|--------------------------------------------------------------|-------------------------------|----------------------|
| DDB1           | Damage Specific DNA Binding Protein 1                        | 127                           | 1092                 |
| DCAF8          | DDB1 And CUL4 Associated Factor 8                            | 67                            | 984                  |
| CUL4A          | Cullin 4A                                                    | 88                            | 901                  |
| RBX1           | RING box 1                                                   | 12                            | 832                  |
| SIRT7          | Sirtuin 7                                                    | 45                            | 798                  |
| PCID2          | PCI Domain Containing 2                                      | 46                            | 722                  |
| DDA1           | DET1 And DDB1 Associated 1                                   | 12                            | 674                  |
| GLMN           | Glomulin, FKBP Associated Protein                            | 68                            | 602                  |
| GRWD1          | Glutamate Rich WD Repeat Containing 1                        | 49                            | 573                  |
| CDT1           | Chromatin Licensing And DNA Replication Factor 1             | 60                            | 552                  |
| COPS8          | COP9 Signalosome Subunit 8                                   | 23                            | 489                  |
| KEAP1          | Kelch Like ECH Associated Protein 1                          | 70                            | 431                  |
| SPOP           | Speckle Type BTB/POZ Protein                                 | 42                            | 409                  |
| b-Actin        | Actin Beta                                                   | 42                            | 387                  |
| KCTD10         | Potassium Channel Tetramerization Domain Containing 10       | 35                            | 325                  |
| WSB1           | WD repeat and SOCS box containing 1                          | 47                            | 321                  |
| NEDD8          | NEDD8 Ubiquitin Like Modifier                                | 9                             | 303                  |
| SP1            | Specificity Protein 1                                        | 81                            | 296                  |
| ITCH           | Itchy E3 Ubiquitin protein ligase                            | 103                           | 287                  |
| ERCC8          | ERCC Excision Repair 8, CSA Ubiquitin Ligase Complex Subunit | 44                            | 277                  |
| NcoR1          | Nuclear Receptor Corepressor 1                               | 270                           | 263                  |
| DCUN1D2        | Defective In Cullin Neddylation 1 Domain Containing 2        | 30                            | 208                  |

**Supplementary Table-4. The DCAF8-associated proteins identified by LC-MS/MS**

| <b>Protein</b> | <b>Protein description</b>                            | <b>Molecular weight (kDa)</b> | <b>MASCOT scores</b> |
|----------------|-------------------------------------------------------|-------------------------------|----------------------|
| DCAF8          | DDB1 And CUL4 Associated Factor 8                     | 67                            | 1523                 |
| DDB1           | Damage Specific DNA Binding Protein 1                 | 127                           | 1435                 |
| CUL4A          | Cullin 4A                                             | 88                            | 1409                 |
| RBX1           | RING box 1                                            | 12                            | 1334                 |
| GAN            | Gigaxonin                                             | 68                            | 1284                 |
| VIM            | Vimentin                                              | 54                            | 1209                 |
| ACTG1          | Actin Gamma 1                                         | 42                            | 1134                 |
| ARHGEF1        | Rho Guanine Nucleotide Exchange Factor 1              | 103                           | 1008                 |
| ANKRD36        | Ankyrin Repeat Domain 36                              | 217                           | 993                  |
| PEX19          | Peroxisomal Biogenesis Factor 19                      | 33                            | 942                  |
| NCSTN          | Nicastrin                                             | 78                            | 846                  |
| CASQ1          | Calsequestrin 1                                       | 45                            | 804                  |
| IGSF8          | Immunoglobulin Superfamily Member 8                   | 65                            | 779                  |
| CDT1           | Chromatin Licensing And DNA Replication Factor 1      | 60                            | 735                  |
| DCUN1D2        | Defective In Cullin Neddylation 1 Domain Containing 2 | 30                            | 665                  |
| COPS8          | COP9 Signalosome Subunit 8                            | 23                            | 626                  |
| KPNA1          | Karyopherin Subunit Alpha 1                           | 66                            | 598                  |
| WSB1           | WD repeat and SOCS box containing 1                   | 47                            | 556                  |
| WDTC1          | WD And Tetratricopeptide Repeats 1                    | 76                            | 524                  |
| PPOX           | Protoporphyrinogen Oxidase                            | 51                            | 467                  |
| SLAMF6         | SLAM Family Member 6                                  | 37                            | 433                  |
| $\beta$ -Actin | Actin Beta                                            | 42                            | 386                  |
| USP21          | Ubiquitin Specific Peptidase 21                       | 63                            | 365                  |
| GBP2           | Guanylate binding protein 2                           | 67                            | 343                  |
| DEDD           | Death Effector Domain Containing                      | 37                            | 324                  |
| PRMT1          | Protein Arginine Methyltransferase 1                  | 42                            | 309                  |
| TAGLN2         | Transgelin 2                                          | 22                            | 302                  |
| AMPD2          | Adenosine Monophosphate Deaminase 2                   | 101                           | 289                  |
| PDE7A          | Phosphodiesterase 7A                                  | 56                            | 277                  |
| CTRL1          | Chymotrypsin-like protease                            | 28                            | 265                  |
| NcoR1          | Nuclear Receptor Corepressor 1                        | 270                           | 254                  |
| DTL            | Denticleless E3 Ubiquitin Protein Ligase Homolog      | 79                            | 235                  |
| TNS2           | Tensin 2                                              | 153                           | 218                  |
| ITLN1          | Intelectin 1                                          | 35                            | 209                  |

**Supplementary Table-5. The aberrantly expressed dependent on NcoR1**

| <b>Gene</b> | <b>Gene description</b>                 | <b>NcoR1-KD</b> | <b>NcoR1-OE</b> |
|-------------|-----------------------------------------|-----------------|-----------------|
| HMGB1       | High Mobility Group Box 1               | 10.3            | -8.6            |
| IL1B        | Interleukin 1 beta                      | 9.8             | -8.2            |
| TNFA        | Tumor Necrosis Factor-Alpha             | 8.4             | -7.8            |
| IL6         | Interleukin 6                           | 8.2             | -8.4            |
| IL15        | Interleukin 15                          | 7.6             | -6.8            |
| IL18        | Prostate cancer associated transcript 6 | 7.1             | -8.1            |
| CCL3        | C-C Motif Chemokine Ligand 3            | 6.4             | -6.1            |
| CCL6        | C-C Motif Chemokine Ligand 6            | 5.4             | -7.2            |
| CXCL12      | C-X-C Motif Chemokine Ligand 12         | 5.1             | -5.5            |
| IFNG        | Interferon Gamma                        | 4.5             | -6.4            |
| ITGAV       | Integrin Subunit Alpha V                | 4.2             | -4.6            |
| S100A12     | S100 Calcium Binding Protein A12        | 3.8             | -5.6            |
| CBX3        | Chromobox 3                             | 3.1             | -3.8            |
| SP100       | Speckled 100 KDa                        | 2.5             | -4.5            |
| CCNA2       | Cyclin A2                               | 2.2             | -5.3            |
| IFNB1       | Interferon Beta 1                       | 5.2             | -3.4            |
| MSH2        | MutS Homolog 2                          | 4.3             | -4.6            |
| CCL2        | C-C Motif Chemokine Ligand 2            | 3.6             | -3.9            |
| MECP2       | Methyl-CpG Binding Protein 2            | 3.1             | -4.5            |
| BRD4        | Bromodomain Containing 4                | 2.8             | -3.6            |
| DNM2        | Dynamin 2                               | -11.3           | 9.3             |
| RFC1        | Replication Factor C Subunit 1          | -9.6            | 7.4             |
| ZC3H12A     | inc Finger CCCH-Type Containing 12A     | -8.4            | 8.2             |
| FEN1        | Flap Structure-Specific Endonuclease 1  | -8.1            | 5.6             |
| PLG         | Plasminogen                             | -7.6            | 8.3             |
| CMA1        | Chymase 1                               | -6.5            | 4.5             |
| SOX18       | SRY-Box Transcription Factor 18         | -5.4            | 7.2             |
| CTNNB1      | Catenin Beta 1                          | -4.8            | 5.4             |
| CCN2        | Cellular Communication Network Factor 2 | -4.6            | 3.2             |
